# Supplementary material
Source: HighWire-hosted journal article supplement (https://ejhp.bmj.com/content/ejhpharm-2017-001421)
Supplement: inline-supplementary-material-1 [file inline-supplementary-material-1.pdf]

## ADDITIONAL MATERIALS

Holistic management of topical chronic skin ulcers.

| TYPE                     | ACTIONS                                                                                                                                                                                  |
|--------------------------|------------------------------------------------------------------------------------------------------------------------------------------------------------------------------------------|
| <b>ANALGESIA</b>         | Instillation of 1mL/cm <sup>2</sup> of topical sevoflurane using sterile technique. Commence irrigation from cleaner to dirtier areas, cleaning and drying wound edges after completion. |
| <b>WOUND HYGIENE</b>     | Wound cleaning after each dressing change (check tissue viability, infection and inflammation, presence of exudate, epithelial edges).                                                   |
| <b>PHARMACOLOGICAL</b>   | Pentoxifylline 400mg oral eight hourly to promote wound healing in venous ulcers. Moisture environment to promote cellular migration.                                                    |
| <b>WOUND COMPRESSION</b> | To promote wound healing in vascular ulcers (rule out arterial disease).                                                                                                                 |
| <b>INFECTION</b>         | Use of silver or cadexomer dressings if appropriate (Vascular Surgeon referral). Tissue and blood cultures if infection suspected. Systemic antibiotics recommended as per local policy. |
| <b>DEBRIDEMENT</b>       | Surgical, mechanical, enzymatic, or autolytic according to location, extension, and depth of ulcer (Vascular Surgeon referral if necrosis, slough, or detritus).                         |
| <b>EXUDATE</b>           | Use of alginate, hydrocolloid and polyurethane foam.                                                                                                                                     |
| <b>OTHER</b>             | Eliminate or minimise cardiovascular risk factors (tobacco, alcohol, glycemic control, regular physical activity).                                                                       |
